# Supplementary material
Source: PubMed Central journal article supplement (PMC7833494)
Supplement: mmc1.pdf [file mmc1.pdf]

# THE LANCET

## Respiratory Medicine

### **Supplementary appendix**

This appendix formed part of the original submission. We post it as supplied by the authors.

Supplement to: Dhawan RT, Gopalan D, Howard L, et al. Beyond the clot: perfusion imaging of the pulmonary vasculature after COVID-19. *Lancet Respir Med* 2020; published online November 17. [http://dx.doi.org/10.1016/S2213-2600\(20\)30407-0](http://dx.doi.org/10.1016/S2213-2600(20)30407-0).

## **Supplementary Appendix**

Supplement to: Dhawan RT et al.

### **Beyond the clot**

### **Perfusion Imaging of the Pulmonary Vasculature after COVID-19**

## **Supplementary Material**

*Supplementary Figure 1:* Illustrative VQ SPECT-CT 3 plane tomography with lung CT overlay and fusion in a non COVID-19 patient

*Supplementary Figure 2:* Illustrative CTPA Imaging with Dual Energy CT Lung Perfusion, MRI Lung perfusion and planar lung perfusion <sup>99m</sup>Tc MAA Scintigraphy in a non COVID-19 patient.

## Supplementary Figure 1

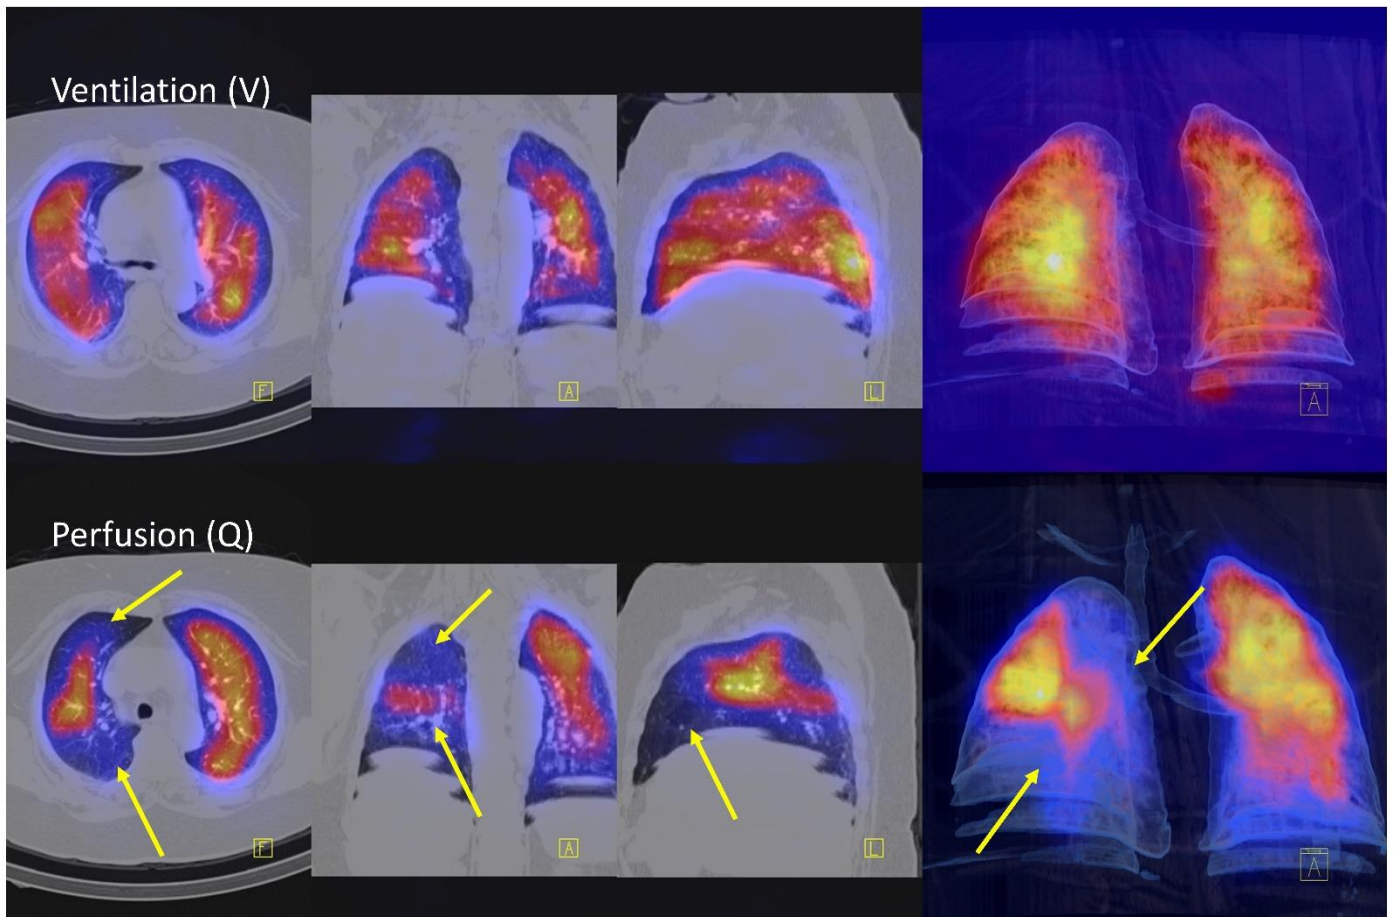

### **Supplementary Figure 1: VQ SPECT-CT 3 plane tomography with lung CT overlay and fusion. Classical findings in venous thrombo-embolism (non –COVID-19)**

*Top Row:*  $^{99m}\text{Tc}$  DTPA aerosol Ventilation SPECT-CT with uniform pattern of ventilation

*Bottom Row:*  $^{99m}\text{Tc}$  MAA Perfusion SPECT-CT with right lung dominant classical segmental perfusion defects and VQ mismatch. No significant parenchymal CT lung abnormality apart from minor non-breathhold artefact. VQ = Ventilation Perfusion, SPECT-CT= Single-photon emission computed tomography with CT fusion, DTPA=diethylenetriamine pentacetic acid. MAA= Macroaggregated albumin.

## Supplementary Figure 2

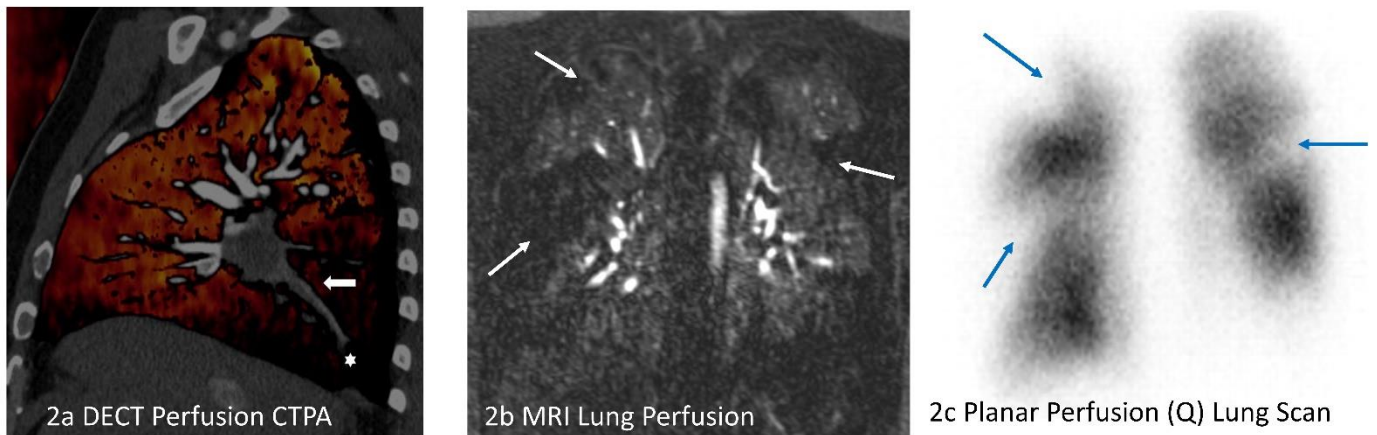

**Supplementary Figure 2a** Left image: **CT Pulmonary angiogram (CTPA) in a non-COVID-19 patient combined with DECT Lung Perfusion Map** shows intra-luminal thrombus in right lower lobe pulmonary artery (arrow and star) and segmental branch vessels (on CTPA) with multi-segmental large perfusion deficit (dark lung) on DECT perfusion map, concordant with territory of luminal thrombus.

**Supplementary Figure 2b** Middle Image: **MRI Lung perfusion** with perfusion defects (dark areas marked with white arrows)

**Supplementary Figure 2c** Right sided image: **Planar  $^{99m}\text{Tc}$  MAA planar scintigraphy** with unresolved concordant perfusion defect at 6 months follow-up in the right upper, mid and left mid zones (blue arrows)

VQ = Ventilation Perfusion, DECT= Dual Energy CT, SPECT-CT= Single-photon emission computed tomography with CT fusion, MAA= Macroaggregated albumin.
